# Supplementary material for: CCNF mutations in amyotrophic lateral sclerosis and frontotemporal dementia
Source: PubMed Central journal article supplement (PMC4835537; doi:10.1038/ncomms11253), 2016-04-15
Supplement: ncomms11253-s1.pdf [file ncomms11253-s1.pdf]

## SUPPLEMENTARY INFORMATION

### Supplementary Figures

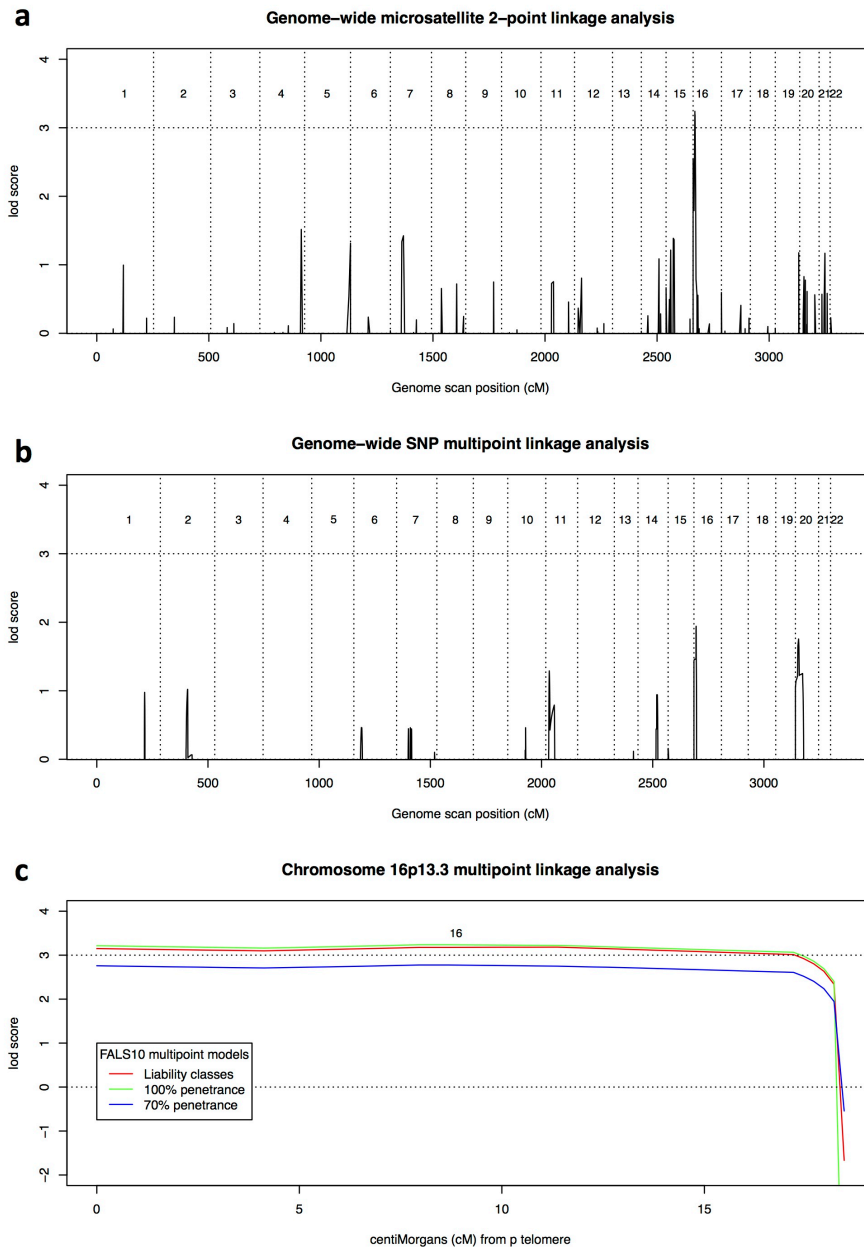

### Supplementary Figure 1. Summary of genetic linkage data from analysis of family FALS10.

Summary of genome-wide linkage analysis using microsatellite markers **(a)** and SNPs **(b)**. Black vertical lines indicate positive LOD scores. No X-chromosome marker generated a LOD score  $> 0$ , hence they are not shown. **(c)** Multipoint linkage analysis of the linked interval on chr16p13.3, using three disease penetrance models.

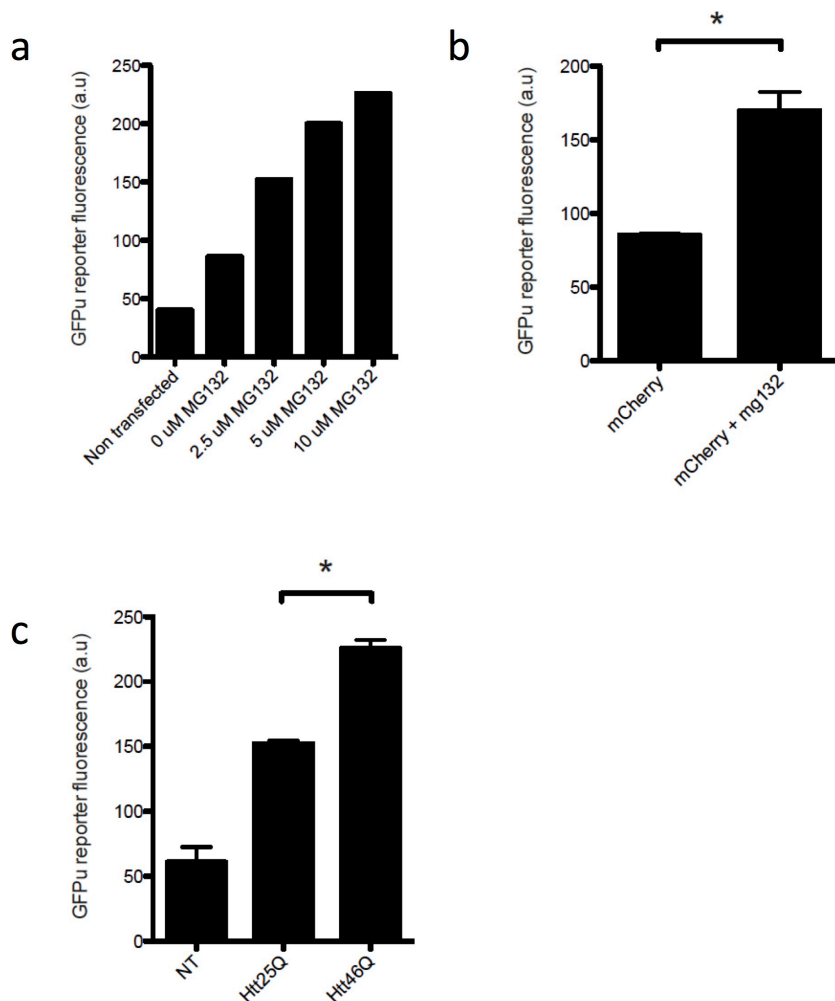

**Supplementary Figure 2. GFP<sup>u</sup> signal correlates with UPS function.** NSC-34 cells were transfected with GFP<sup>u</sup>. The fluorescence intensity of GFP<sup>u</sup> was analyzed with flow cytometry. **(a)** Cells were treated with various doses of MG132 at 24 h post-transfection and incubated for a further 24 h before analysis. A dose-dependent increase of GFP<sup>u</sup> fluorescence was observed when proteasome function was inhibited by MG132. **(b)** NSC-34 cells were co-transfected with GFP<sup>u</sup> and empty pmCherry vector. After 24 h, cells were treated with 5ug/ml MG132 and incubated for a further 24 h before analysis. A significant accumulation of GFP<sup>u</sup> fluorescence was found ( $p = 0.003$ ,  $df = 4$ ), indicating that co-transfection with pmCherry did not affect proteostasis of GFP<sup>u</sup>. **(c)** NSC-34 cells were co-transfected with Huntingtin exon1 fragments containing an expanded polyQ (Htt25Q and Htt46Q). The fluorescence was measured 48 h post-transfection. Htt25Q and Htt46Q have been previously shown to inhibit the proteasome. A significant increase of GFP<sup>u</sup> fluorescence was observed ( $p = 0.0005$ ,  $df = 4$ ). Data are represented as mean  $\pm$  s.e.m.  $n = 3$ ; \* $P < 0.05$ .

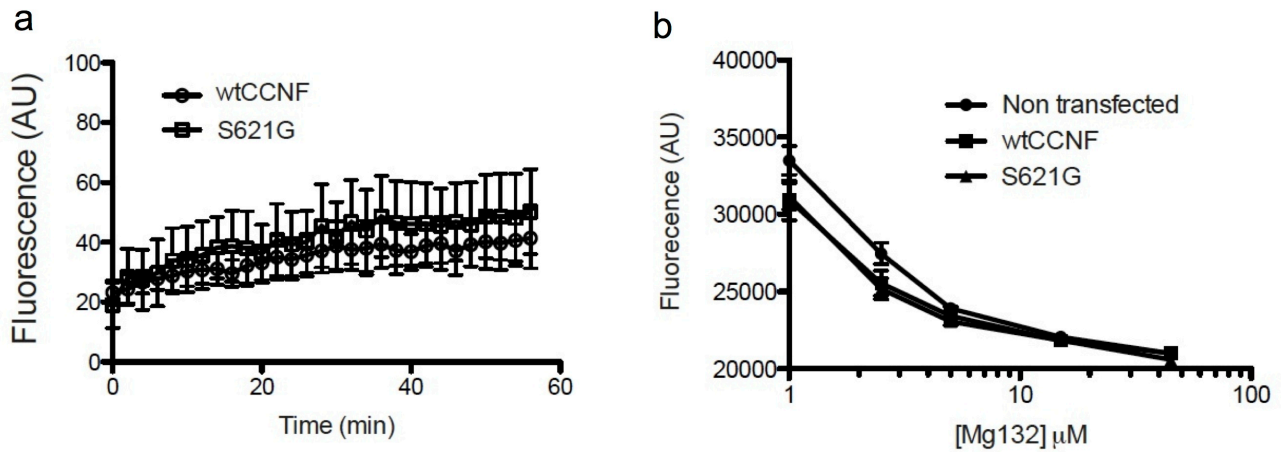

**Supplementary Figure 3. Dysfunction of ubiquitin-mediated degradation was not due to altered proteasome activity.** NSC-34 cells were transfected with either wild type or mutant *CCNF* tagged with mCherry. Proteasome enzymatic activity was measured by fluorogenic proteasome assays 48 h post-transfection. **(a)** Protein lysate was generated from transfected NSC-34 cells and the kinetics of 20S proteasome chymotrypsin-like protease activity was measured using the Suc-LLVY-AMC fluorogenic peptide substrate (Enzo Life Sciences). Fluorescence changes were measured at 2 min intervals for 50 min. No significant difference was found between wild type and mutant cyclin F. **(b)** Proteasome activity was measured in intact NSC-34 cells using a cell permeable proteasome substrate (Abcam). No significance difference was found between wild type and mutant cyclin F. Data are represented as mean  $\pm$  s.e.m.  $n = 3$ .

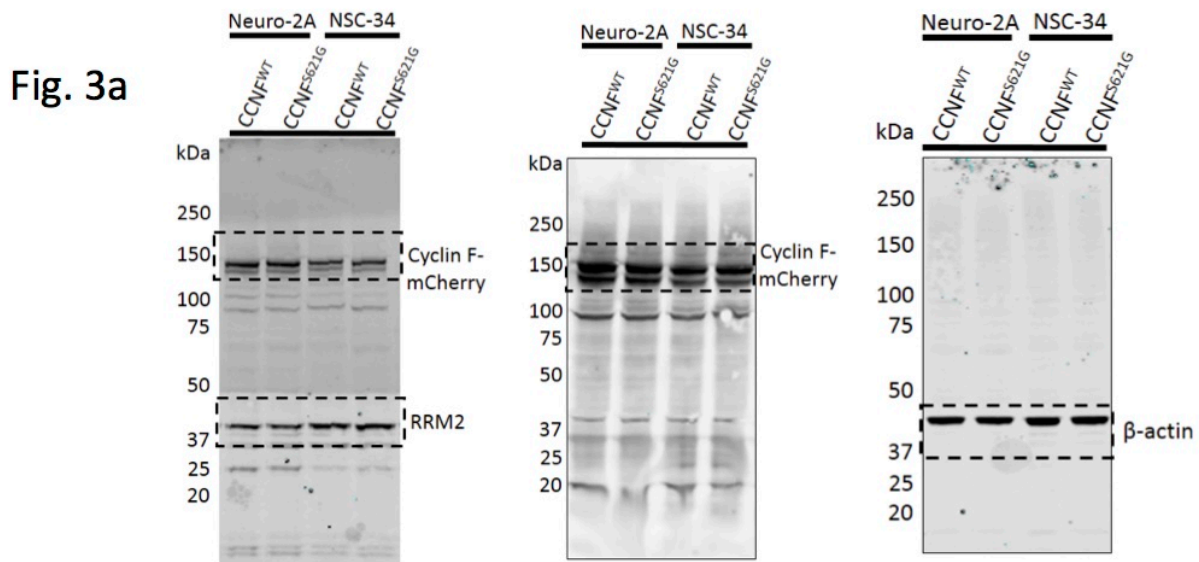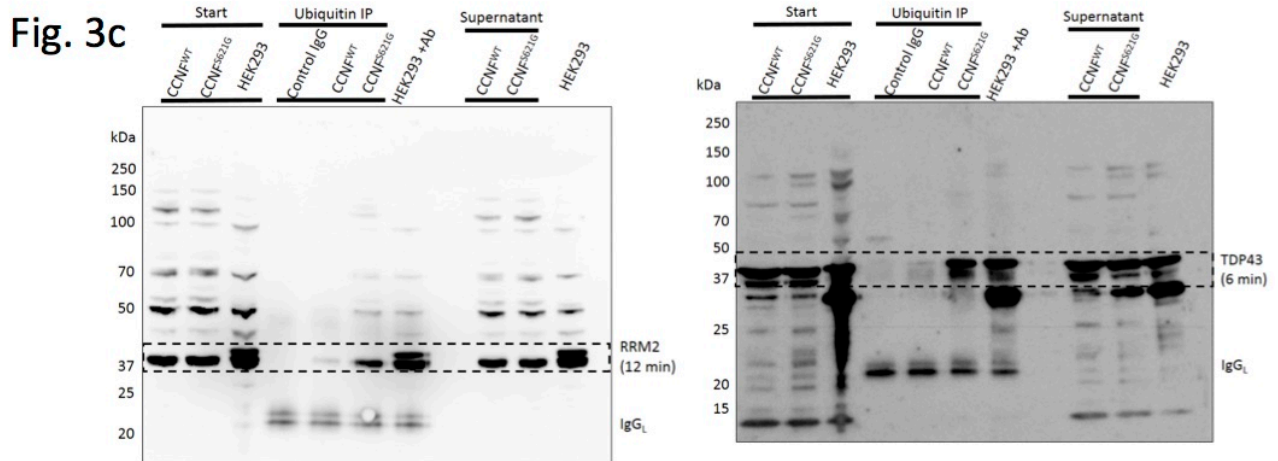

Supplementary Figure 4. Full-length pictures of blots presented in Figure 3.

## Supplementary Tables

**Supplementary Table 1. Two-point LOD scores for family FALS10 using microsatellite markers from the chromosome 16 minimum candidate disease haplotype.**

| Marker          | cM           | LOD (theta=0) | Allele size | Allele frequency |
|-----------------|--------------|---------------|-------------|------------------|
| D16S521         | 1.14         | 1.72          | 166*        | 0.017857*        |
| D16S3401        | 1.143        | 2.55          | 165         | 0.176471         |
| D16S3024        | 5.27         | 1.79          | 228         | 0.3125           |
| <b>D16S3082</b> | <b>9.09</b>  | <b>3.24</b>   | <b>208*</b> | <b>0.160714*</b> |
| D16S475         | 9.83         | 2.89          | 180         | 0.1875           |
| D16S2622        | 9.831        | 2.48          | 79*         | 0.185185*        |
| <b>D16S3065</b> | <b>9.832</b> | <b>3.19</b>   | <b>162*</b> | <b>0.017857*</b> |
| D16S3134        | 12.51        | 2.06          | 161*        | 0.42*            |
| D16S423         | 14.05        | 0.79          | 125*        | 0.357143*        |
| D16S3088        | 18.34        | 0.57          | 219*        | 0.462963*        |
| D16S418         | 19.59        | -3.23         | 179         | 0.0625           |

LOD scores >3 are in bold. \*CEPH allele size and frequency.

**Supplementary Table 2. Filtering steps to identify causative gene mutation in ALS/FTD family FALS10.**

| <b>Filter</b>                     | <b>Variants</b>                    |
|-----------------------------------|------------------------------------|
| Total variants identified         | 292,989                            |
| Present in all affected           | 35,930                             |
| Alters amino acid sequence        | 5,109                              |
| Novel variants                    | 2 (dbSNP, EVS, 1000 genomes, ExAC) |
| Within linkage region chr16p13.3* | 1                                  |

\* No novel variants were identified on chromosomes 11 or 20.

**Supplementary Table 3. Characteristics of familial ALS/FTD patients with *CCNF* mutations.**

| Family         | Amino acid change | Origin    | Diagnosis | Sex | Age of onset (years) | Duration (months) | Site of Onset | Cognitive impairment       |
|----------------|-------------------|-----------|-----------|-----|----------------------|-------------------|---------------|----------------------------|
| FALS10; III:1  | S621G             | Australia | ALS       | M   | 54                   | 12                | Bulbar        |                            |
| FALS10; II:14  | S621G             | Australia | ALS       | F   | 61                   | 60                | Limb          |                            |
| FALS10; II:13  | S621G             | Australia | ALS       | F   | Died at 81           | unknown           | Bulbar        |                            |
| FALS10; II:10  | S621G             | Australia | FTD       | F   | Died at 72           | unknown           |               | FTD                        |
| FALS10; III:15 | S621G             | Australia | ALS       | M   | 58                   | >6                | Limb          |                            |
| FALS10; III:4* | S621G             | Australia | ALS       | M   | 42                   | 44                | Limb          |                            |
| FALS10; II:2*  | S621G             | Australia | ALS       | F   | Died at 74           | unknown           | unknown       | Multiple strokes, dementia |
| FALS10; II:6*  | S621G             | Australia | ALS       | M   | Died at 68           | unknown           | Limb          |                            |
| NA09-350       | S3G               | USA       | FTLD-ALS  | M   | 66                   | 14                | unknown       | FTD                        |
| ALS0057        | K97R              | UK        | ALS       | F   | 44                   | >20               | Limb          |                            |
| ALS0084        | I772T             | UK        | PLS       | F   | 62                   | unknown           | Limb          |                            |
| SP-37          | S195R             | Spain     | ALS       | F   | 54                   | 21                | unknown       |                            |
| IT             | S509P             | Italian   | ALS       | M   | 57                   | unknown           | Limb          |                            |

\*Mutation could not be confirmed through sequencing as no DNA was available, however segregation analysis confirmed the presence of the mutation.

**Supplementary Table 4. Novel and rare protein-altering *CCNF* variants identified in the ALS and/or FTD discovery cohorts.**

| Amino acid change     | Nucleotide change | rs ID       | ALS/FTD MAF (population)     | Control MAF (n>950) | Public database MAF                                          | ExAC Frequency (population specific) |
|-----------------------|-------------------|-------------|------------------------------|---------------------|--------------------------------------------------------------|--------------------------------------|
| p.H69Y <sup>#</sup>   | 205C>T            | Novel       | 0.002976 (CA SALS)           | 0                   | Absent                                                       | -                                    |
| p.A74T                | 220G>A            | rs4589553   | 0.006667 (AU FALS)           | 0                   | NA (dbSNP)                                                   | -                                    |
| p.G161R               | 481G>A            | rs148159882 | 0.019231 (US SALS)           | 0                   | NA (dbSNP)<br>0.000077 (ESP)                                 | 0.000062 (European, non-Finnish)     |
| p.T181I               | 542C>T            | Novel       | 0.003534 (JA SALS)           | 0                   | Absent                                                       | 0.000116 (East Asian)                |
| p.V318G               | 953T>G            | rs201540325 | 0.006667 (AU FALS)           | 0.074744            | NA (dbSNP)                                                   | -                                    |
| p.R344K               | 1031G>A           | rs371050277 | 0.015152 (JA FALS)           | 0                   | NA (dbSNP)<br>0.000077 (ESP)                                 | 0.000695 (East Asian)                |
| p.L372fs <sup>§</sup> | 1114_1115insC     | Novel       | 0.006667 (AU FALS)           | 0                   | Absent                                                       | -                                    |
| p.R392T               | 1175G>C           | Novel       | 0.010101 (US FTLT)           | 0                   | Absent                                                       | -                                    |
| p.R406Q               | 1217G>A           | rs146438723 | 0.005051 (US FTLT-MND)       | 0.002068            | NA (dbSNP)<br>0.001616 (ESP)                                 | -                                    |
| p.E528Q               | 1582G>C           | Novel       | 0.001767 (JA SALS)           | 0                   | 0.002743 (HGVD)                                              | 0.000463 (East Asian)                |
| p.L531R               | 1592T>C           | rs372723774 | 0.003155 (JA FALS & JA SALS) | 0                   | NA (dbSNP)<br>0.001667 (HGVD)                                | 0.003704 (East Asian)                |
| p.T543I               | 1628C>T           | Novel       | 0.003534 (JA SALS)           | 0                   | Absent                                                       | -                                    |
| p.R574Q               | 1721G>A           | rs369730776 | 0.002976 (CA SALS)           | 0                   | NA (dbSNP)<br>0.000231 (ESP)                                 | 0.000018 (European, non-Finnish)     |
| p.F604I               | 1810T>A           | rs118131564 | 0.012367 (JA SALS)           | 0.004785            | 0.000693 (ESP)<br>0.020202 (1000 genomes)<br>0.014602 (HGVD) | 0.011661 (East Asian)                |
| p.E624K               | 1870G>A           | Novel       | 0.020408 (US SALS trios)     | 0                   | Absent                                                       | 0.000016 (European, non-Finnish)     |
| p.Q669*               | 2005C>T           | rs145521789 | 0.005051 (US FTLT-MND)       | 0                   | NA (dbSNP)<br>0.000077 (ESP)                                 | 0.000015 (European, non-Finnish)     |
| p.R691Q               | 2072G>A           | rs148419125 | 0.001767 (JA SALS)           | 0                   | 0.000308 (ESP)<br>0.000459 (1000 genomes)<br>0.002060 (HGVD) | 0.001970 (East Asian)                |
| p.T698M               | 2093C>T           | rs201460257 | 0.006944 (AU sporadic FTD)   | 0                   | 0.000 (dbSNP)<br>0.000459 (1000 genomes)                     | -                                    |
| p.V714M               | 2140G>A           | rs61755288  | 0.017606 (AU FALS & CA SALS) | 0.013220            | 0.010619 (ESP)<br>0.005510 (1000 genomes)                    | 0.014407 (European, non-Finnish)     |

*CCNF* accession NM\_001761. AU, Australian; CA, Canadian; JA, Japanese; UK, United Kingdom; US, USA; HGVD, Human Genetic Variation Database (Japanese; <http://www.genome.med.kyoto-u.ac.jp/SnpDB>); NA, not available. <sup>#</sup> H69Y is listed here because other variants at the H69 codon are present in dbSNP, (including p.H69D, rs369245530). <sup>§</sup> Variant does not segregate with disease.



## Supplemental notes

### **Additional clinical information for familial ALS/FTD cases with *CCNF* mutations.**

**Family FALS10** In the linked ALS/FTD family FALS10, the average age of onset was  $53.8 \pm 8.3$  years (range 42 – 61) and the average duration of disease was  $38.7 \pm 24.4$  months (range 12 – 60 months). Including age information from four at-risk carriers, the age-dependent penetrance in family FALS10 is estimated to be 50% by age 56 and 100% by 61.

**FALS10, III:4** The patient started to show symptoms of ALS at age 42 with weakness of movement of right thumb, tiredness, weakness of legs, twitches in muscles, cramping of calves and slurring of speech. No swallowing or breathing difficulty was observed. Examination revealed a mild slurring. There was mild weakness of the palate and pharyngeal muscles. Upper limb weakness was confined to the hands. Wasting was present in the right thenar region and in the abductor digiti minimi. Also weak were the adductor pollicis on the right and the extensor pollicis longus and brevis on both sides, but more on the right. In the lower limbs weakness was confined to the muscles below the knee with the left side more affected. Tibialis anterior, toe extensors and the peronei were considerably affected on both sides. The right tibialis posterior was only mildly affected. No obvious wasting was present in the lower limbs. Widespread occasional fasciculations were noted in all limbs. Sensory examination was normal.

**FALS10, II:13** This patient presented with a history of progressive dysarthria with weakness in the arms and legs for several months. Upon examination, the patient had dysarthria, but no tongue fasciculations or weakness. The jaw jerk was present and brisk and cranial nerves were intact. There was some reduction of facial expressions and bradykinesia with mild increased tone in the neck and extremities. The patient had grade 4/5 strength (MRC grading) for shoulder abduction and small muscles of the hands. Proximal leg weakness was also observed. Fasciculation was noted generally in the upper limbs and the right quadriceps. Ankle tendon reflexes were reduced. EMG showed wide spread denervation including the tongue. Nerve conduction studies did not indicate a neuropathy. No dementia is present, but the patient has mild parkinsonian features.

**FALS10, III:1** The first symptom observed in this patient was the inability to move the tongue properly. Upon examination, the patient had localized tongue fasciculations that were confirmed by EMG and nerve conduction studies. No other fasciculations were evident, however the patient had extensor plantaris. There was no evidence of nerve conduction failure. During disease progression, the patient had significant speech problems and fasciculation were evident in the arms and legs.

**FALS10, II:4** This patient had asymmetrical muscular atrophy more marked in the right upper limb progressing to the left upper limb. There was bilateral weakness of dorsiflexion of the feet. The disease progressed distally rather than proximally with no convincing upper motor neurone features.

**SP-37** Age at onset was 54.3 years with a duration of illness about 20.5 months. Her father had dementia plus parkinsonism. Her grandmother had generalized weakness (dysphagia and dysarthria) and died at age 75.

**IT** Male, onset at age 57 in his left leg, classic ALS with UMN and LMN signs, no dementia. His mother and a sister of his maternal grandmother had ALS; his maternal grandmother had dementia, while a maternal aunt had PD.

**NA09-350** Male, Caucasian. Clinical and pathological diagnosis of FTLD-MND with TDP-43 type 1 pathology. Age at onset was 66.3 years, age at death was 67.5 years. Balance disturbances with falls and personality change (angry, irritable, apathetic, withdrawn). Re: family history of dementia in first degree relative, relevant for mother with Alzheimer disease diagnosed when she was 76 years of age, passing away when she was 86 years of age.
